# Supplementary material for: Safety and Efficacy of Semorinemab in Individuals With Prodromal to Mild Alzheimer Disease: A Randomized Clinical Trial
Source: PubMed Central journal article supplement — JAMA Neurol. 2022 Jun 13;79(8):758–67. doi: 10.1001/jamaneurol.2022.1375 (PMC9194753; doi:10.1001/jamaneurol.2022.1375), 2022-06-13
Supplement: jamaneurol-e221375-s003.pdf [file jamaneurol-e221375-s003.pdf]

\*First name, last name, and suffix (if applicable) are required and will appear in PubMed.

| <b>*Group Name(s): The Tauriel Investigators</b> |                   |                              |                  |                                      |                                              |                                                         |                                                                                            |
|--------------------------------------------------|-------------------|------------------------------|------------------|--------------------------------------|----------------------------------------------|---------------------------------------------------------|--------------------------------------------------------------------------------------------|
| <b>*First Name and Middle Initial(s)</b>         | <b>*Last Name</b> | <b>*Suffix (eg, Jr, III)</b> | Academic Degrees | Institution                          | Location (city, state/province, country)     | Role or Contribution, eg, chair, principal investigator | Group (if more than 1 Group listed in the byline) and/or Subgroup (eg, Steering Committee) |
| Peter                                            | Farnbach          |                              |                  | NeuroCentrix                         | Noble Park, Victoria, Australia              |                                                         | Tauriel Investigators                                                                      |
| Chris                                            | Kyndt             |                              |                  | Royal Melbourne Hospital             | Parkville, Victoria, Australia               |                                                         | Tauriel Investigators                                                                      |
| Terence                                          | O'Brien           |                              |                  | Royal Melbourne Hospital             | Parkville, Victoria, Australia               |                                                         | Tauriel Investigators                                                                      |
| Nawaf                                            | Yassi             |                              |                  | Royal Melbourne Hospital             | Parkville, Victoria, Australia               |                                                         | Tauriel Investigators                                                                      |
| Terence                                          | O'Brien           |                              |                  | The Alfred Hospital                  | Parkville, Victoria, Australia               |                                                         | Tauriel Investigators                                                                      |
| Raymond                                          | Schwartz          |                              |                  | Southern Neurology                   | Kogarah, New South Wales, Australia          |                                                         | Tauriel Investigators                                                                      |
| Siddhartha                                       | Lieten            |                              |                  | Universitair Ziekenhuis Brussel      | Bruxelles, Belgium                           |                                                         | Tauriel Investigators                                                                      |
| Rik                                              | Vandenberghe      |                              |                  | UZ Leuven                            | Leuven, Belgium                              |                                                         | Tauriel Investigators                                                                      |
| Frederik                                         | Vanhee            |                              |                  | AZ Groeninge                         | Kortrijk, Belgium                            |                                                         | Tauriel Investigators                                                                      |
| Richard                                          | Bergeron          |                              |                  | Clinique de la Memoire de l'Outaoua  | Gatineau, Quebec, Canada                     |                                                         | Tauriel Investigators                                                                      |
| Sandra                                           | Black             |                              |                  | Toronto Sunnybrook Hospital          | Toronto, Ontario, Canada                     |                                                         | Tauriel Investigators                                                                      |
| Sharon                                           | Cohen             |                              |                  | Toronto Memory Program (Neurolog     | Toronto, Ontario, Canada                     |                                                         | Tauriel Investigators                                                                      |
| Andrew                                           | Frank             |                              |                  | Bruyere Continuing Care              | Ottawa, Ontario, Canada                      |                                                         | Tauriel Investigators                                                                      |
| William                                          | Nisker            |                              |                  | JBN Medical Diagnostic Services Inc. | Burlington, Ontario, Canada                  |                                                         | Tauriel Investigators                                                                      |
| Maria Carmela                                    | Tartaglia         |                              |                  | Toronto Western Hospital             | Toronto, Ontario, Canada                     |                                                         | Tauriel Investigators                                                                      |
| Annette                                          | Justesen          |                              |                  | CCBR - Vejle - DK                    | Vejle, Denmark                               |                                                         | Tauriel Investigators                                                                      |
| Peter                                            | Alexandersen      |                              |                  | CCBR - Vejle - DK                    | Vejle, Denmark                               |                                                         | Tauriel Investigators                                                                      |
| Soren                                            | Nielsen           |                              |                  | CCBR - Ålborg - DK                   | Ålborg, Denmark                              |                                                         | Tauriel Investigators                                                                      |
| Anna                                             | Areovimata        |                              |                  | CCBR - Ålborg - DK                   | Ålborg, Denmark                              |                                                         | Tauriel Investigators                                                                      |
| Pierre                                           | Anthony           |                              |                  | Centre pour Personnes Âgées          | Colmar, Haut Rhin, France                    |                                                         | Tauriel Investigators                                                                      |
| Serge                                            | Belliard          |                              |                  | CHU Rennes - Pontchaillou            | Rennes cedex 2, Ille et Vilaine, France      |                                                         | Tauriel Investigators                                                                      |
| Frédéric                                         | Blanc             |                              |                  | CHU Strasbourg - Hôpital Hautepierr  | Strasbourg cedex, Bas Rhin, France           |                                                         | Tauriel Investigators                                                                      |
| Mathieu                                          | Ceccaldi          |                              |                  | Hôpital de la Timone                 | Marseille cedex 05, Bouches-du-Rhône, France |                                                         | Tauriel Investigators                                                                      |
| Bruno                                            | Dubois            |                              |                  | Groupe Hospitalier Pitie-Salpetriere | Paris Cedex 13, Paris, France                |                                                         | Tauriel Investigators                                                                      |
| Pierre                                           | Krolak-Salmon     |                              |                  | Hôpital des Chapennes                | Villeurbanne, Rhone, France                  |                                                         | Tauriel Investigators                                                                      |
| Hélène                                           | Mollion           |                              |                  | CHU de Lyon - Hopital Neurologique   | Bron, Rhone, France                          |                                                         | Tauriel Investigators                                                                      |
| Florence                                         | Pasquier          |                              |                  | CHU Lille - Hopital Roger Salengro   | Lille, Nord, France                          |                                                         | Tauriel Investigators                                                                      |
| Timo                                             | Grimmer           |                              |                  | Klinikum rechts der Isar der TU Muer | Muenchen, Bayern, Germany                    |                                                         | Tauriel Investigators                                                                      |
| Monika Elisabeth                                 | Kottke-Arbeiter   |                              |                  | Klinische Forschung Hannover-Mitte   | Hannover, Niedersachsen, Germany             |                                                         | Tauriel Investigators                                                                      |

## Supplemental Online Content: Nonauthor Collaborators

\*First name, last name, and suffix (if applicable) are required and will appear in PubMed.

| *First Name and Middle Initial(s) | *Last Name           | *Suffix (eg, Jr, III) | Academic Degrees | Institution                                             | Location (city, state/province, country) | Role or Contribution, eg, chair, principal investigator | Group (if more than 1 Group listed in the byline) and/or Subgroup (eg, Steering Committee) |
|-----------------------------------|----------------------|-----------------------|------------------|---------------------------------------------------------|------------------------------------------|---------------------------------------------------------|--------------------------------------------------------------------------------------------|
| Christoph                         | Laske                |                       |                  | Universitaetsklinikum Tuebingen                         | Tuebingen, Baden Wuerttemberg, Germany   |                                                         | Tauriel Investigators                                                                      |
| Oliver                            | Peters               |                       |                  | Charite - Campus Berlin Buch, Experimentelle Neurologie | Berlin, Berlin, Germany                  |                                                         | Tauriel Investigators                                                                      |
| Dörte                             | Polivka              |                       |                  | Universitaetsklinikum Ulm                               | Ulm, Baden Wuerttemberg, Germany         |                                                         | Tauriel Investigators                                                                      |
| Christine                         | von Arnim            |                       |                  | Universitaetsklinikum Ulm                               | Ulm, Baden Wuerttemberg, Germany         |                                                         | Tauriel Investigators                                                                      |
| Giuseppe                          | Bruno                |                       |                  | Azienda Ospedaliera Universitaria Policlinica           | Roma, Roma, Italy                        |                                                         | Tauriel Investigators                                                                      |
| Carlo                             | De Lena              |                       |                  | Azienda Ospedaliera Universitaria Policlinica           | Roma, Roma, Italy                        |                                                         | Tauriel Investigators                                                                      |
| Emanuele                          | Cassetta             |                       |                  | Ospedale San Giovanni Calabita Fatebenefratelli         | Cassino, Frosinone, Italy                |                                                         | Tauriel Investigators                                                                      |
| Diego                             | Centonze             |                       |                  | I.R.C.C.S. Neuromed-Istituto Neurologico                | Pozzilli, Isernia, Italy                 |                                                         | Tauriel Investigators                                                                      |
| Giancarlo                         | Logroscino           |                       |                  | Azienda Ospedaliera Card. G. Panico                     | Tricase, Lecce, Italy                    |                                                         | Tauriel Investigators                                                                      |
| Paul                              | Dautzenberg          |                       |                  | Jeroen Bosch Ziekenhuis                                 | s Hertogenbosch, Netherlands             |                                                         | Tauriel Investigators                                                                      |
| Sterre                            | Rutgers              |                       |                  | Brain Research Center                                   | Amsterdam, Netherlands                   |                                                         | Tauriel Investigators                                                                      |
| Niels                             | Prins                |                       |                  | Brain Research Center                                   | Amsterdam, Netherlands                   |                                                         | Tauriel Investigators                                                                      |
| Maciej                            | Czarnecki            |                       |                  | Centrum Medyczne NeuroProtect                           | Warszawa, Poland                         |                                                         | Tauriel Investigators                                                                      |
| Jacek                             | Dobryniewski         |                       |                  | Podlaskie Centrum Psychogeriatricum                     | Bialystok, Poland                        |                                                         | Tauriel Investigators                                                                      |
| Jan                               | Ilkowski             |                       |                  | NZOZ "NEURO-KARD", "Ilkowski i Partnerzy"               | Poznan, Poland                           |                                                         | Tauriel Investigators                                                                      |
| Gabriela                          | Klodowska            |                       |                  | Neuro-Care Gabriela Klodowska                           | Katowice, Poland                         |                                                         | Tauriel Investigators                                                                      |
| Anna                              | Krygowska-Wajs       |                       |                  | Pratia MCM Krakow                                       | Krakow, Poland                           |                                                         | Tauriel Investigators                                                                      |
| Robert                            | Kucharski            |                       |                  | PALLMED Sp. z o.o.                                      | Bydgoszcz, Poland                        |                                                         | Tauriel Investigators                                                                      |
| Anatol                            | Mickielewicz         |                       |                  | Centrum Medyczne AMED Warszawa                          | Warszawa, Poland                         |                                                         | Tauriel Investigators                                                                      |
| Marcin                            | Ratajczak            |                       |                  | Osrodek Badan Klinicznych EUROMED                       | Szczecin, Poland                         |                                                         | Tauriel Investigators                                                                      |
| Marzena                           | Zboch                |                       |                  | NZOZ Wroclawskie Centrum Alzheimer                      | Scinawa, Poland                          |                                                         | Tauriel Investigators                                                                      |
| Tomasz                            | Zielinski            |                       |                  | Novo-Med Zielinski i wspolnicy Sp. j.                   | Katowice, Poland                         |                                                         | Tauriel Investigators                                                                      |
| Pedro                             | Abizanda Soler       |                       |                  | Hospital Perpetuo Socorro                               | Albacete, Albacete, Spain                |                                                         | Tauriel Investigators                                                                      |
| Eduardo                           | Agüera Morales       |                       |                  | Hospital Universitario Reina Sofia                      | Cordoba, Córdoba, Spain                  |                                                         | Tauriel Investigators                                                                      |
| Miquel                            | Baquero Toledo       |                       |                  | Hospital Universitari i Politecnic La Fe                | Valencia, Valencia, Spain                |                                                         | Tauriel Investigators                                                                      |
| Rafael                            | Blesa González       |                       |                  | Hospital de la Santa Creu i Sant Pau                    | Barcelona, Barcelona, Spain              |                                                         | Tauriel Investigators                                                                      |
| Mercè                             | Boada Rovira         |                       |                  | Fundacio ACE                                            | Barcelona, Barcelona, Spain              |                                                         | Tauriel Investigators                                                                      |
| Antonio                           | Del Olmo Rodriguez   |                       |                  | Hospital Universitario Dr. Peset                        | Valencia, Valencia, Spain                |                                                         | Tauriel Investigators                                                                      |
| Jerzy                             | Krupinski            |                       |                  | Hospital Universitario Mutua de Terrassa                | Terrassa, Barcelona, Spain               |                                                         | Tauriel Investigators                                                                      |
| Gurutz                            | Linazasoro Cristobal |                       |                  | Policlinica Gipuzkoa                                    | San Sebastian, Guipuzcoa, Spain          |                                                         | Tauriel Investigators                                                                      |
| Jesús                             | López Arrieta        |                       |                  | Hospital de Cantoblanco                                 | Madrid, Madrid, Spain                    |                                                         | Tauriel Investigators                                                                      |

Supplemental Online Content: Nonauthor Collaborators

\*First name, last name, and suffix (if applicable) are required and will appear in PubMed.

| *First Name and Middle Initial(s) | *Last Name             | *Suffix (eg, Jr, III) | Academic Degrees | Institution                            | Location (city, state/province, country)   | Role or Contribution, eg, chair, principal investigator | Group (if more than 1 Group listed in the byline) and/or Subgroup (eg, Steering Committee) |
|-----------------------------------|------------------------|-----------------------|------------------|----------------------------------------|--------------------------------------------|---------------------------------------------------------|--------------------------------------------------------------------------------------------|
| Mario                             | Riverol Fernandez      |                       |                  | Clinica Universidad de Navarra         | Pamplona, Navarra, Spain                   |                                                         | Tauriel Investigators                                                                      |
| Raquel                            | Sanchez Del Valle Diaz |                       |                  | Hospital Clinic de Barcelona           | Barcelona, Barcelona, Spain                |                                                         | Tauriel Investigators                                                                      |
| Félix                             | Viñuela Fernandez      |                       |                  | Hospital Universitario Virgen Macare   | Sevilla, Sevilla, Spain                    |                                                         | Tauriel Investigators                                                                      |
| Michael                           | Jonsson                |                       |                  | Sahlgrenska Universitetssjukhuset, M   | Mölndal, Sweden                            |                                                         | Tauriel Investigators                                                                      |
| Henrik                            | Östlund                |                       |                  | Skånes Universitetssjukhus, Malmö      | Malmö, Sweden                              |                                                         | Tauriel Investigators                                                                      |
| Josephine Emer                    | MacSweeney             |                       |                  | Re:Cognition Health Ltd (London)       | London, Greater London, United Kingdom     |                                                         | Tauriel Investigators                                                                      |
| Catherine                         | Mummery                |                       |                  | The National Hospital for Neurology    | London, Greater London, United Kingdom     |                                                         | Tauriel Investigators                                                                      |
| Marc                              | Agronin                |                       |                  | Miami Jewish Health System, Inc        | Miami, Florida, United States              |                                                         | Tauriel Investigators                                                                      |
| Thomas                            | Ala                    |                       |                  | Southern Illinois University Neurology | Springfield, Illinois, United States       |                                                         | Tauriel Investigators                                                                      |
| Wendy                             | Bond                   |                       |                  | Neuropsychiatric Research Center of    | Fort Myers, Florida, United States         |                                                         | Tauriel Investigators                                                                      |
| Frederick                         | Schaerf                |                       |                  | Neuropsychiatric Research Center of    | Fort Myers, Florida, United States         |                                                         | Tauriel Investigators                                                                      |
| Mark                              | Brody                  |                       |                  | Brain Matters Research                 | Delray Beach, Florida, United States       |                                                         | Tauriel Investigators                                                                      |
| Keith                             | Edwards                |                       |                  | Empire Neurology, PC                   | Latham, New York, United States            |                                                         | Tauriel Investigators                                                                      |
| Concetta                          | Forchetti              |                       |                  | Alexian Brothers Medical Center - Ne   | Elk Grove Village, Illinois, United States |                                                         | Tauriel Investigators                                                                      |
| Ajay                              | Sood                   |                       |                  | Alexian Brothers Medical Center - Ne   | Elk Grove Village, Illinois, United States |                                                         | Tauriel Investigators                                                                      |
| David                             | Geldmacher             |                       |                  | University of Alabama at Birmingham    | Birmingham, Alabama, United States         |                                                         | Tauriel Investigators                                                                      |
| Mark                              | Goldstein              |                       |                  | JEM Research Institute                 | Atlantis, Florida, United States           |                                                         | Tauriel Investigators                                                                      |
| Ira                               | Goodman                |                       |                  | Synexus Clinical Research US, Inc. - O | Orlando, Florida, United States            |                                                         | Tauriel Investigators                                                                      |
| David                             | Hart                   |                       |                  | Albany Medical College                 | Albany, New York, United States            |                                                         | Tauriel Investigators                                                                      |
| Lawrence                          | Honig                  |                       |                  | Perlmutter Cancer Center NYU Lango     | New York, New York, United States          |                                                         | Tauriel Investigators                                                                      |
| William                           | Justiz                 |                       |                  | Collier Neurologic Specialists, LLC    | Naples, Florida, United States             |                                                         | Tauriel Investigators                                                                      |
| Allan                             | Levey                  |                       |                  | Emory University                       | Atlanta, Georgia, United States            |                                                         | Tauriel Investigators                                                                      |
| Scott                             | Losk                   |                       |                  | Summit Research Network (Oregon)       | Portland, Oregon, United States            |                                                         | Tauriel Investigators                                                                      |
| Gad                               | Marshall               |                       |                  | Brigham and Women's Hospital           | Boston, Massachusetts, United States       |                                                         | Tauriel Investigators                                                                      |
| Walter                            | Martinez               |                       |                  | Premiere Research Institute            | West Palm Beach, Florida, United States    |                                                         | Tauriel Investigators                                                                      |
| Peter                             | McAllister             |                       |                  | KI Health Partners, LLC                | Stamford, Connecticut, United States       |                                                         | Tauriel Investigators                                                                      |
| William Alvin                     | McElveen               |                       |                  | Bradenton Research Center, Inc.        | Bradenton, Florida, United States          |                                                         | Tauriel Investigators                                                                      |
| Orlando                           | Maldonado-Robles       |                       |                  | Bradenton Research Center, Inc.        | Bradenton, Florida, United States          |                                                         | Tauriel Investigators                                                                      |
| Cynthia                           | Murphy                 |                       |                  | The Memory Clinic                      | Bennington, Vermont, United States         |                                                         | Tauriel Investigators                                                                      |
| Malini                            | Nair                   |                       |                  | Alzheimers Disease Center              | Quincy, Massachusetts, United States       |                                                         | Tauriel Investigators                                                                      |
| Anil                              | Nair                   |                       |                  | Alzheimers Disease Center              | Quincy, Massachusetts, United States       |                                                         | Tauriel Investigators                                                                      |

## Supplemental Online Content: Nonauthor Collaborators

\*First name, last name, and suffix (if applicable) are required and will appear in PubMed.

| *First Name and Middle Initial(s) | *Last Name   | *Suffix (eg, Jr, III) | Academic Degrees | Institution                            | Location (city, state/province, country)        | Role or Contribution, eg, chair, principal investigator | Group (if more than 1 Group listed in the byline) and/or Subgroup (eg, Steering Committee) |
|-----------------------------------|--------------|-----------------------|------------------|----------------------------------------|-------------------------------------------------|---------------------------------------------------------|--------------------------------------------------------------------------------------------|
| Omid                              | Omidvar      |                       |                  | Collaborative Neuroscience Network     | Garden Grove, California, United States         |                                                         | Tauriel Investigators                                                                      |
| Nader                             | Oskooilar    |                       |                  | Pharmacology Research Institute        | Newport Beach, California, United States        |                                                         | Tauriel Investigators                                                                      |
| Anton                             | Porsteinsson |                       |                  | University of Rochester                | Rochester, New York, United States              |                                                         | Tauriel Investigators                                                                      |
| Michael                           | Rosenbloom   |                       |                  | Center for Memory and Aging            | St. Paul, Minnesota, United States              |                                                         | Tauriel Investigators                                                                      |
| David                             | Russell      |                       |                  | Molecular Neuroimaging                 | New Haven, Connecticut, United States           |                                                         | Tauriel Investigators                                                                      |
| Seyed Ahmad                       | Sajjadi      |                       |                  | University of California - Irvine      | Irvine, California, United States               |                                                         | Tauriel Investigators                                                                      |
| Aimee                             | Pierce       |                       |                  | University of California - Irvine      | Irvine, California, United States               |                                                         | Tauriel Investigators                                                                      |
| Stephen                           | Salloway     |                       |                  | Butler Hospital                        | Providence, Rhode Island, United States         |                                                         | Tauriel Investigators                                                                      |
| Sharon                            | Sha          |                       |                  | Stanford Hospital and Clinics          | Palo Alto, California, United States            |                                                         | Tauriel Investigators                                                                      |
| Raj                               | Shah         |                       |                  | Rush University Medical Center-Chicago | Chicago, Illinois, United States                |                                                         | Tauriel Investigators                                                                      |
| Sanjiv                            | Sharma       |                       |                  | Advanced Memory Research Institute     | Toms River, New Jersey, United States           |                                                         | Tauriel Investigators                                                                      |
| William                           | Smith        |                       |                  | AMR New Orleans, Formerly New Orleans  | Knoxville, Tennessee, United States             |                                                         | Tauriel Investigators                                                                      |
| Lee                               | Stein        |                       |                  | Neurology Clinic, PC                   | Cordova, Tennessee, United States               |                                                         | Tauriel Investigators                                                                      |
| John                              | Stoukides    |                       |                  | Rhode Island Mood & Memory Research    | East Providence, Rhode Island, United States    |                                                         | Tauriel Investigators                                                                      |
| Stephen                           | Thein        |                       |                  | Pacific Research Network, Inc          | San Diego, California, United States            |                                                         | Tauriel Investigators                                                                      |
| Raymond                           | Turner       |                       |                  | Georgetown University Medical Center   | Washington, District of Columbia, United States |                                                         | Tauriel Investigators                                                                      |
| David                             | Watson       |                       |                  | Alzheimer's Research and Treatment     | Lake Worth, Florida, United States              |                                                         | Tauriel Investigators                                                                      |
| David                             | Weisman      |                       |                  | Abington Neurological Associates       | Willow Grove, Pennsylvania, United States       |                                                         | Tauriel Investigators                                                                      |
